# Supplementary material for: New chiral organoantimony(iii) compounds containing intramolecular N → Sb interactions – solution behaviour and solid state structures
Source: Royal Society of Chemistry journal article supplement (doi:10.1039/c003318a), 2010-01-01
Supplement: c003318a.pdf [file c003318a.pdf]

## Electronic Supplementary Information

### **New chiral organoantimony(III) compounds containing intramolecular N→Sb interactions – solution behaviour and solid state structures**

**Dana Copolovici,<sup>a</sup> Vilma R. Bojan,<sup>a</sup> Ciprian I. Raț,<sup>a</sup> Anca Silvestru,<sup>a</sup> Hans J. Breunig<sup>b</sup> and Cristian Silvestru<sup>\*a</sup>**

<sup>a</sup> Facultatea de Chimie si Inginerie Chimica, Universitatea Babes-Bolyai, RO-400028, Cluj-Napoca, Romania. Fax: (+40) 264-590818; Tel: (+40) 264-593833; E-mail: cristi@chem.ubbcluj.ro

<sup>b</sup> Institut für Anorganische und Physikalische Chemie, Universität Bremen, D-28334, Bremen, Germany. Fax: (+49) 421-218-62809; Tel: (+49) 421-218-63150; E-mail: hbreunig@uni-bremen.de

**[2-(Me<sub>2</sub>NCH<sub>2</sub>)C<sub>6</sub>H<sub>4</sub>]PhSbCl (1)**

**Coalescence of the NMe<sub>2</sub> resonances in C<sub>6</sub>D<sub>6</sub>**

<sup>1</sup>H NMR (200 MHz, 20 °C, C<sub>6</sub>D<sub>6</sub>): δ 1.33 [3 H, s, N(CH<sub>3</sub>)<sub>2</sub> (A)], 1.62 [3 H, s, N(CH<sub>3</sub>)<sub>2</sub> (B)], AB spin system with A at 2.76 and B at 2.96 ppm (2 H, CH<sub>2</sub>, <sup>2</sup>J<sub>HH</sub> 14.2 Hz), 6.82 (1 H, d, H-3, C<sub>6</sub>H<sub>4</sub>, <sup>3</sup>J<sub>HH</sub> 7.4 Hz), 7.02 (3 H, m, H-*meta+para*, C<sub>6</sub>H<sub>5</sub>), 7.15 (1 H, m, H-4, C<sub>6</sub>H<sub>4</sub>, partially overlapped by residual solvent resonance), 7.30 (1 H, dd, H-5, C<sub>6</sub>H<sub>4</sub>, <sup>3</sup>J<sub>HH</sub> 7.4 Hz), 7.51 (2 H, m, H-*ortho*, C<sub>6</sub>H<sub>5</sub>), 8.99 (1 H, dd, H-6, C<sub>6</sub>H<sub>4</sub>, <sup>3</sup>J<sub>HH</sub> 7.5, <sup>4</sup>J<sub>HH</sub> 1.1 Hz).

<sup>1</sup>H NMR (200 MHz, 65 °C, C<sub>6</sub>D<sub>6</sub>): δ 1.58 [6 H, s,br, N(CH<sub>3</sub>)<sub>2</sub>], AB spin system with A at 2.92 and B at 3.06 ppm (2 H, CH<sub>2</sub>, <sup>2</sup>J<sub>HH</sub> 14.1 Hz), 6.84 (1 H, d, H-3, C<sub>6</sub>H<sub>4</sub>, <sup>3</sup>J<sub>HH</sub> 7.4 Hz), 7.04 (3 H, m, H-*meta+para*, C<sub>6</sub>H<sub>5</sub>), 7.14 (1 H, m, H-4, C<sub>6</sub>H<sub>4</sub>, partially overlapped by residual solvent resonance), 7.30 (1 H, dd, H-5, C<sub>6</sub>H<sub>4</sub>, <sup>3</sup>J<sub>HH</sub> 7.4 Hz), 7.51 (2 H, m, H-*ortho*, C<sub>6</sub>H<sub>5</sub>), 8.88 (1 H, d, H-6, C<sub>6</sub>H<sub>4</sub>, <sup>3</sup>J<sub>HH</sub> 7.4 Hz).

**Coalescence of both NMe<sub>2</sub> resonances and methylene AB system, respectively, in DMSO-d<sub>6</sub>**

<sup>1</sup>H NMR (200 MHz, 20 °C, DMSO-d<sub>6</sub>): δ 2.01 [3 H, s, N(CH<sub>3</sub>)<sub>2</sub> (A)], 2.41 [3 H, s, N(CH<sub>3</sub>)<sub>2</sub> (B)], AB spin system with A at 3.48 (partially overlapped by water resonance) and B at 3.83 ppm (2 H, CH<sub>2</sub>, <sup>2</sup>J<sub>HH</sub> 14.6 Hz), 7.35 (4 H, m, H-3, C<sub>6</sub>H<sub>4</sub>, and H-*meta+para*, C<sub>6</sub>H<sub>5</sub>), 7.47 (4 H, m, H-4,5, C<sub>6</sub>H<sub>4</sub>, and H-*ortho*, C<sub>6</sub>H<sub>5</sub>), 8.30 (1 H, m, H-6, C<sub>6</sub>H<sub>4</sub>).

<sup>1</sup>H NMR (200 MHz, 50 °C, DMSO-d<sub>6</sub>): δ 2.22 [6 H, s,br, N(CH<sub>3</sub>)<sub>2</sub>], AB spin system with A at 3.51 and B at 3.83 ppm (2 H, CH<sub>2</sub>, <sup>2</sup>J<sub>HH</sub> 14.2 Hz), 7.35 (4 H, m, H-3, C<sub>6</sub>H<sub>4</sub>, and H-*meta+para*, C<sub>6</sub>H<sub>5</sub>), 7.47 (4 H, m, H-4,5, C<sub>6</sub>H<sub>4</sub>, and H-*ortho*, C<sub>6</sub>H<sub>5</sub>), 8.32 (1 H, m, H-6, C<sub>6</sub>H<sub>4</sub>).

<sup>1</sup>H NMR (200 MHz, 78 °C, DMSO-d<sub>6</sub>): δ 2.23 [6 H, s,br, N(CH<sub>3</sub>)<sub>2</sub>], 3.69 (2 H, s,br, CH<sub>2</sub>), 7.34 (4 H, m, H-3, C<sub>6</sub>H<sub>4</sub>, and H-*meta+para*, C<sub>6</sub>H<sub>5</sub>), 7.48 (4 H, m, H-4,5, C<sub>6</sub>H<sub>4</sub>, and H-*ortho*, C<sub>6</sub>H<sub>5</sub>), 8.34 (1 H, m, H-6, C<sub>6</sub>H<sub>4</sub>).

[2-(Me<sub>2</sub>NCH<sub>2</sub>)C<sub>6</sub>H<sub>4</sub>]PhSbBr (2)

- the crystal contains a 1:1 mixture of (*R*<sub>N</sub>,*A*<sub>Sb</sub>) and (*S*<sub>N</sub>,*C*<sub>Sb</sub>) isomers

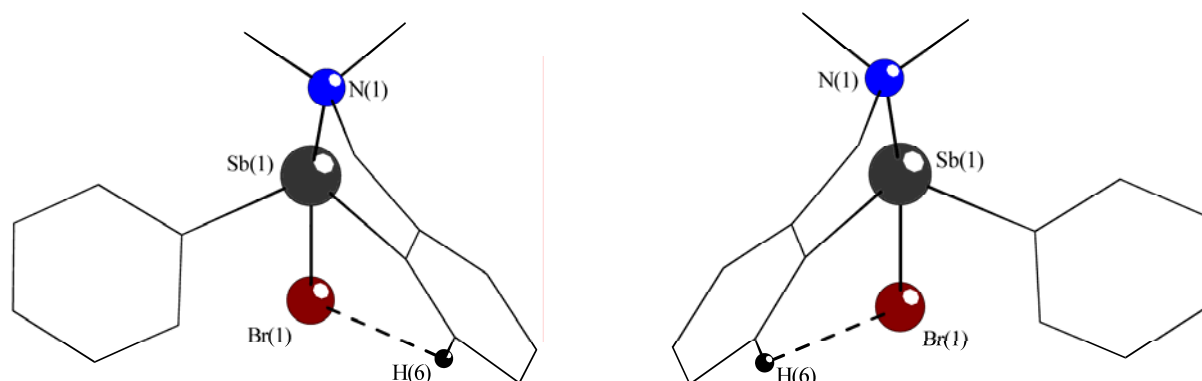

**Figure S1.** Molecular structure of (*R*<sub>N</sub>,*A*<sub>Sb</sub>)-2 isomer (*left*) and (*S*<sub>N</sub>,*C*<sub>Sb</sub>)-2 isomer (*right*) in the crystal of 2, showing the intramolecular bromine-hydrogen contact (only hydrogen atoms involved in intramolecular contacts are shown).

- intramolecular distance  $\text{Br}(1)\cdots\text{H}(6)$  2.81 Å  $\sum r_{\text{vdW}}(\text{Br},\text{H})$  3.15 Å

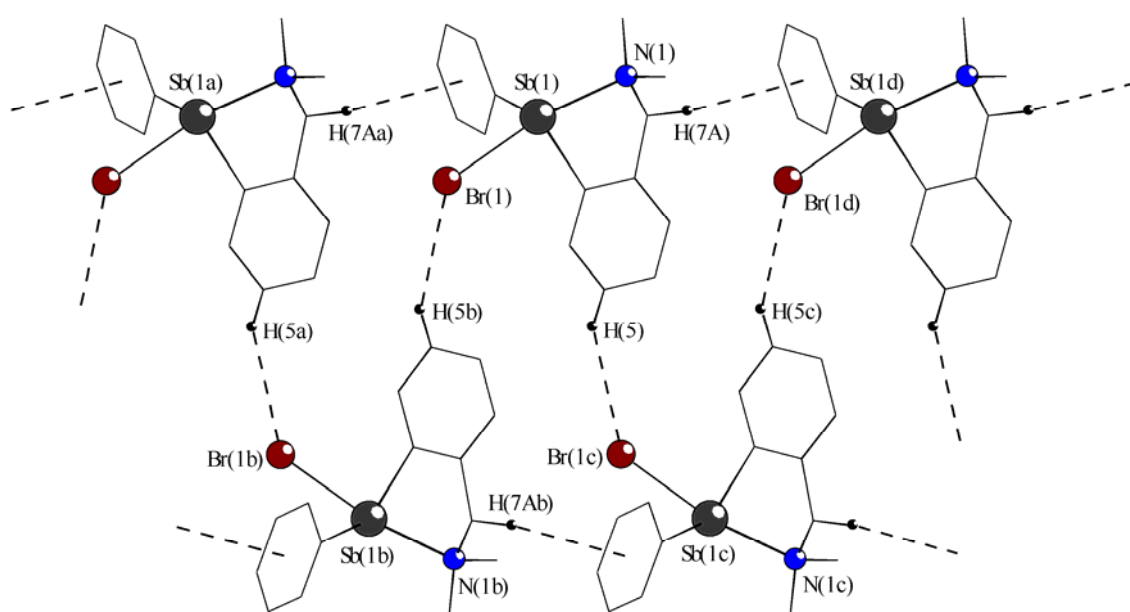

**Figure S2.** View of a chain polymer based on Br $\cdots$ H<sub>aryl</sub> and C-H<sub>methylene</sub> $\cdots$  $\pi$  (Ph<sub>centroid</sub>) contacts between (*S*<sub>N</sub>,*C*<sub>Sb</sub>)-2 isomers in the crystal of 2 (only hydrogen atoms involved in intermolecular contacts are shown) [symmetry equivalent atoms (*x*, -1 + *y*, *z*), (0.5 - *x*, -0.5 + *y*, 0.5 - *z*), (0.5 - *x*, 0.5 + *y*, 0.5 - *z*) and (0.5 - *x*, 0.5 + *y*, 0.5 - *z*) are given by “a”, “b”, “c” and “d”, respectively].

- intermolecular distance  $\text{Br}(1)\cdots\text{H}(5a)$  3.12 Å  
 $\text{C}(7)\text{-H}(7A)\cdots\pi$  (Ph<sub>centroid</sub>) 2.95 Å

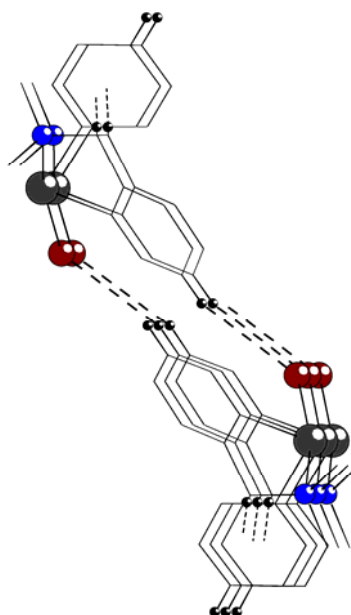

**Figure S3.** View along  $b$  axis of a chain polymer built from  $(S_N, C_{Sb})$ -**2** isomers in the crystal of **2** through  $\text{Br}\cdots\text{H}_{\text{aryl}}$  and  $\text{C}-\text{H}_{\text{methylene}}\cdots\pi$  ( $\text{Ph}_{\text{centroid}}$ ) contacts.

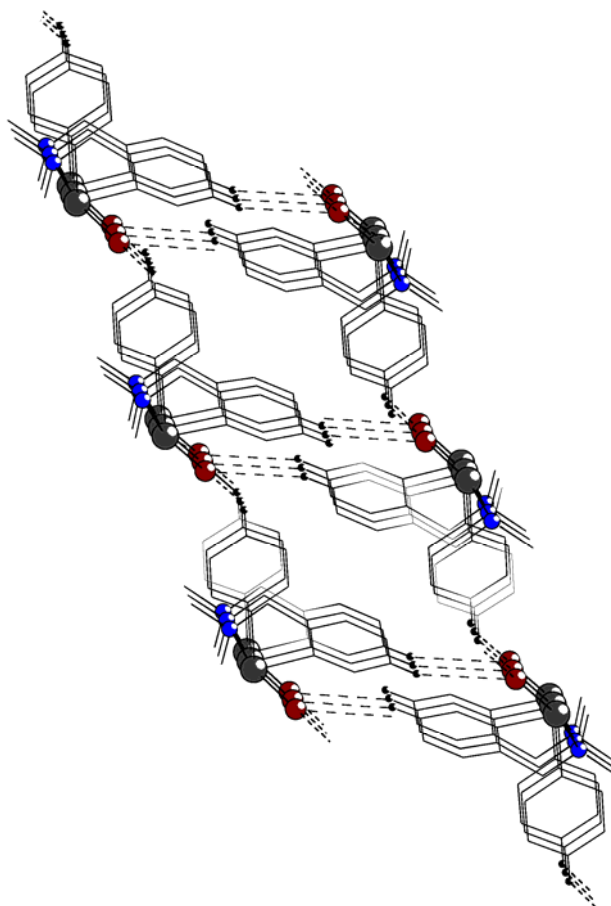

**Figure S4.** View of a layer with inter-chain  $\text{Br}\cdots\text{H}_{\text{aryl}}$  contacts between alternating chain polymers built from  $(S_N, C_{Sb})$ -**2** and  $(R_N, A_{Sb})$ -**2** isomers, respectively, in the crystal of **2**.

- inter-chain distance

$\text{Br}(1)\cdots\text{H}(13)$  3.14 Å

$\sum r_{\text{vdW}}(\text{Br}, \text{H})$  3.15 Å

**[2-(Me<sub>2</sub>NCH<sub>2</sub>)C<sub>6</sub>H<sub>4</sub>]PhSbI (3)**

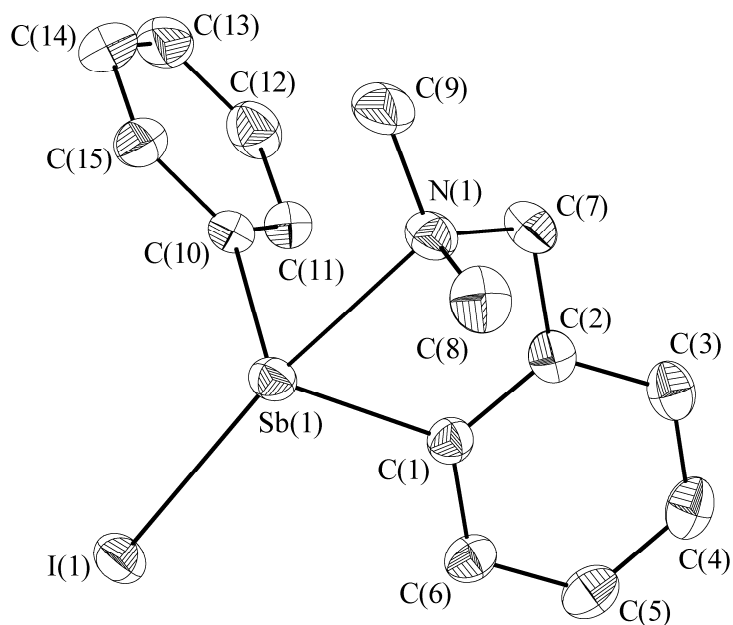

**Figure S5.** ORTEP representation at 30% probability and atom numbering scheme for (*S<sub>N</sub>*, *C<sub>Sb</sub>*)-**3** isomer. Hydrogen atoms are omitted.

- the crystal contains a 1:1 mixture of (*R<sub>N</sub>*, *A<sub>Sb</sub>*) and (*S<sub>N</sub>*, *C<sub>Sb</sub>*) isomers

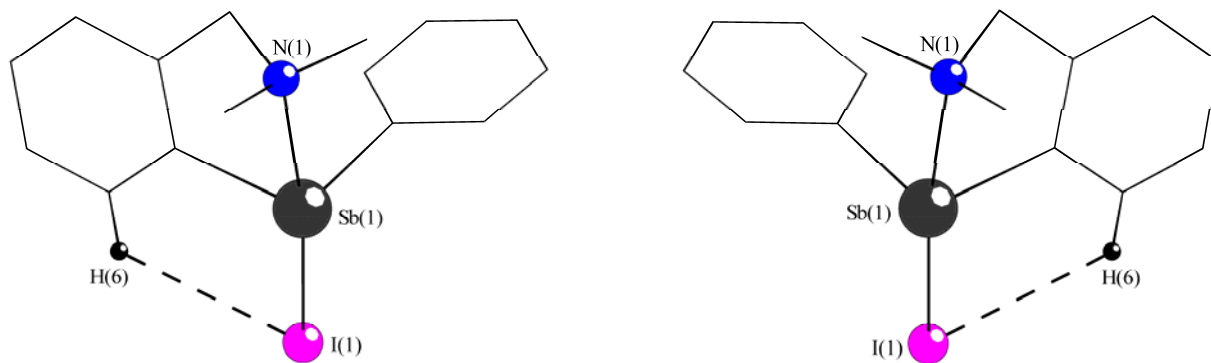

**Figure S6.** Molecular structure of (*R<sub>N</sub>*, *A<sub>Sb</sub>*)-**3** isomer (*left*) and (*S<sub>N</sub>*, *C<sub>Sb</sub>*)-**3** isomer (*right*) in the crystal of **3**, showing the intramolecular iodine-hydrogen contact (only hydrogen atoms involved in intramolecular contacts are shown).

- intramolecular distance      I(1)⋯H(6) 3.04 Å       $\sum r_{vdw}(I,H)$  3.35 Å

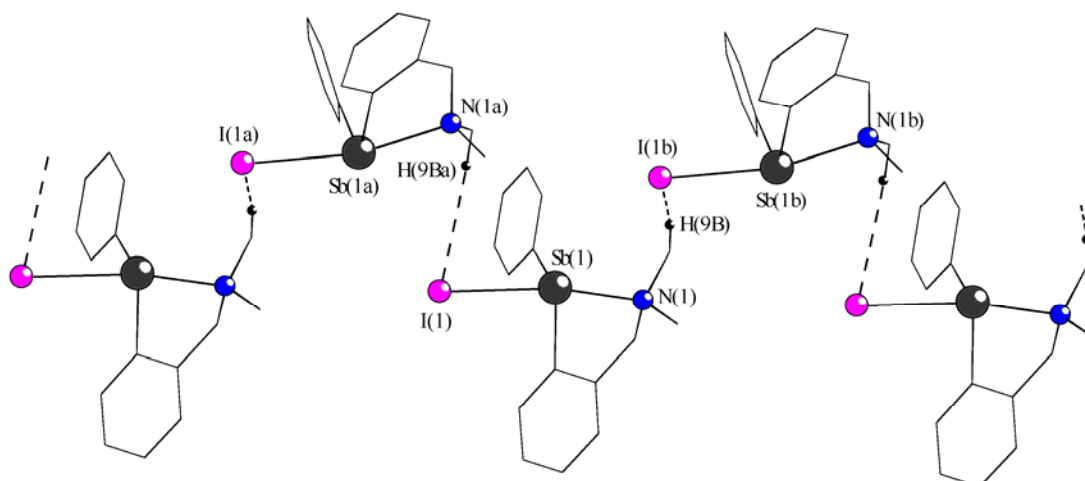

**Figure S7.** View of a chain polymer based on  $I \cdots H_{\text{methyl}}$  contacts between alternating ( $S_N, C_{Sb}$ )-**3** and ( $R_N, A_{Sb}$ )-**3** isomers in the crystal of **3** (only hydrogen atoms involved in intermolecular contacts are shown) [symmetry equivalent atoms  $(x, 0.5 - y, 0.5 + z)$  and  $(x, 0.5 - y, -0.5 + z)$  are given by “a” and “b”, respectively].

- intermolecular distance  $I(1) \cdots H(9B)$  3.22 Å  $\sum r_{\text{vdw}}(I, H)$  3.35 Å

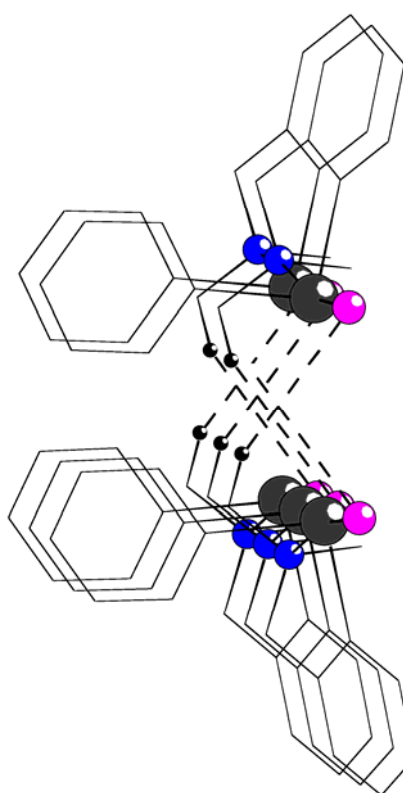

**Figure S8.** View along  $c$  axis of a chain polymer in the crystal of **3**.

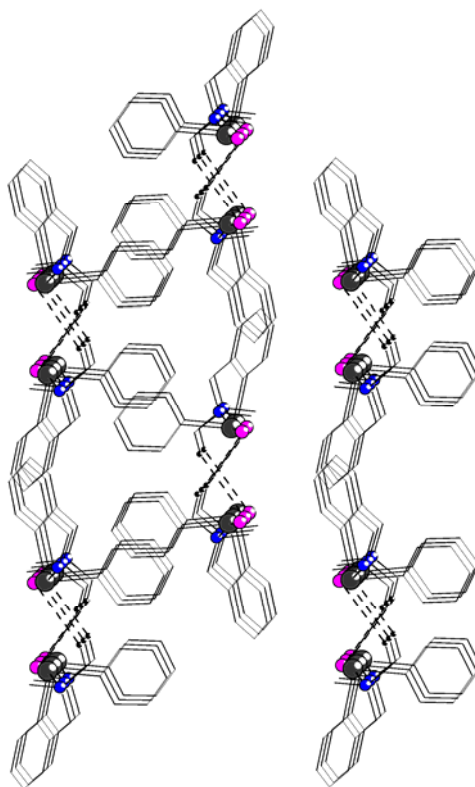

**Figure S9.** View along *c* axis of parallel chain polymers in the crystal of **3**.

- no further I...H contacts between parallel chains.

[2-(Me<sub>2</sub>NCH<sub>2</sub>)C<sub>6</sub>H<sub>4</sub>]Ph<sub>2</sub>Sb (**4**)

- the crystal contains a 1:1 mixture of (*R*<sub>N</sub>,*C*<sub>Sb</sub>) and (*S*<sub>N</sub>,*A*<sub>Sb</sub>) isomers

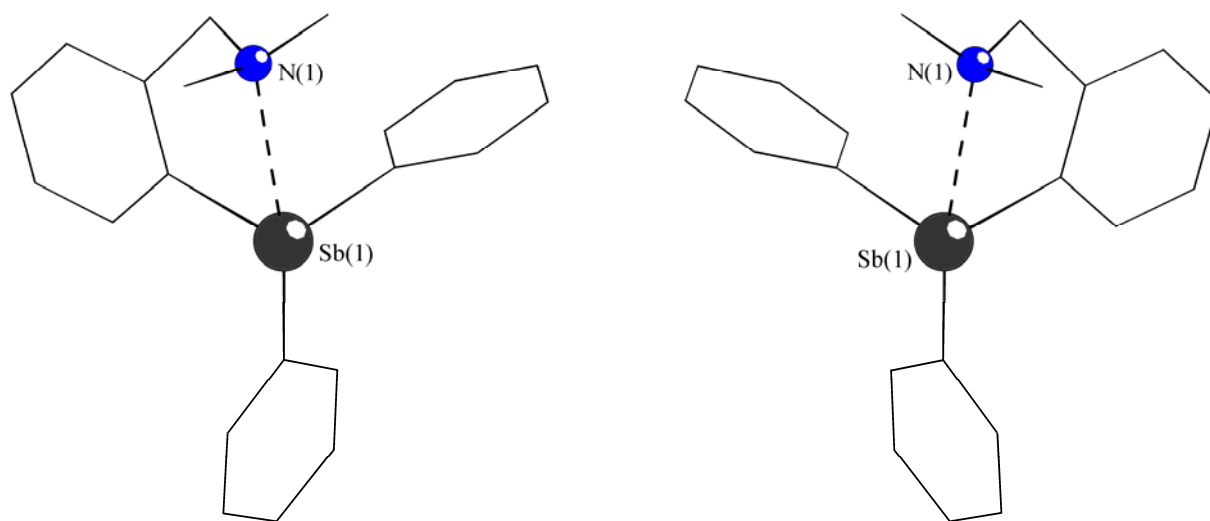

**Figure S10.** Molecular structure of (*R*<sub>N</sub>,*C*<sub>Sb</sub>)-**4** isomer (*left*) and (*S*<sub>N</sub>,*A*<sub>Sb</sub>)-**4** isomer (*right*) in the crystal of **4**.

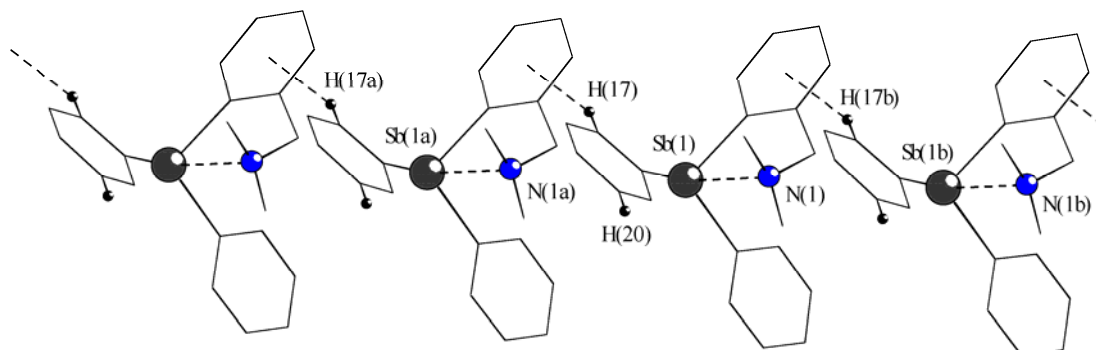

**Figure S11.** View of a chain polymer based on C-H<sub>aryl</sub>... $\pi$  (Ph<sub>centroid</sub>) contacts between (*R*<sub>N</sub>,*C*<sub>Sb</sub>)-**4** isomers in the crystal of **4** (only hydrogen atoms involved in intermolecular contacts are shown) [symmetry equivalent atoms (*x*, *y*,  $-1 + z$ ) and (*x*, *y*,  $1 + z$ ) are given by “a” and “b”, respectively].

- intra-chain distance C(17)-H(17)... $\pi$  (Ph<sub>centroid</sub>) 2.80 Å



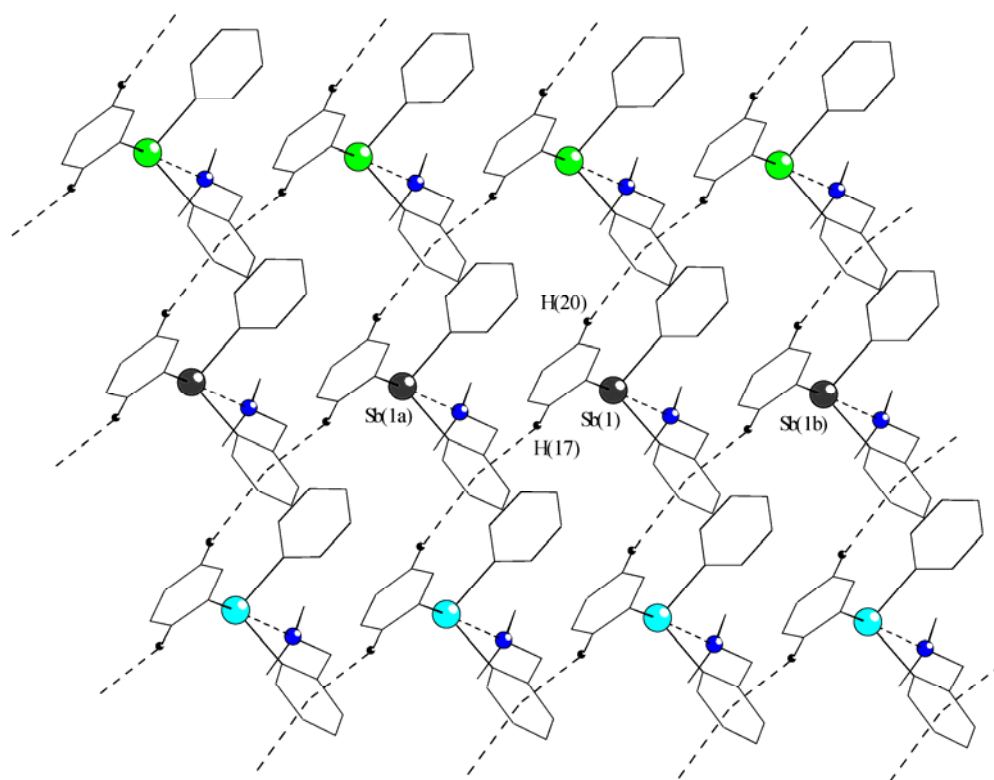

**Figure S12.** View of a layer of  $(R_N, C_{Sb})$ -4 isomers based on  $C-H_{\text{aryl}} \cdots \pi$  ( $\text{Ph}_{\text{centroid}}$ ) contacts in the crystal of 4 (only hydrogen atoms involved in intermolecular contacts are shown).

- inter-chain distance  $C(20)-H(20) \cdots \pi$  ( $\text{Ph}_{\text{centroid}}$ ) 2.93 Å
- no further contacts between parallel, alternative layers of  $(R_N, C_{Sb})$  and  $(S_N, A_{Sb})$  isomers, respectively.

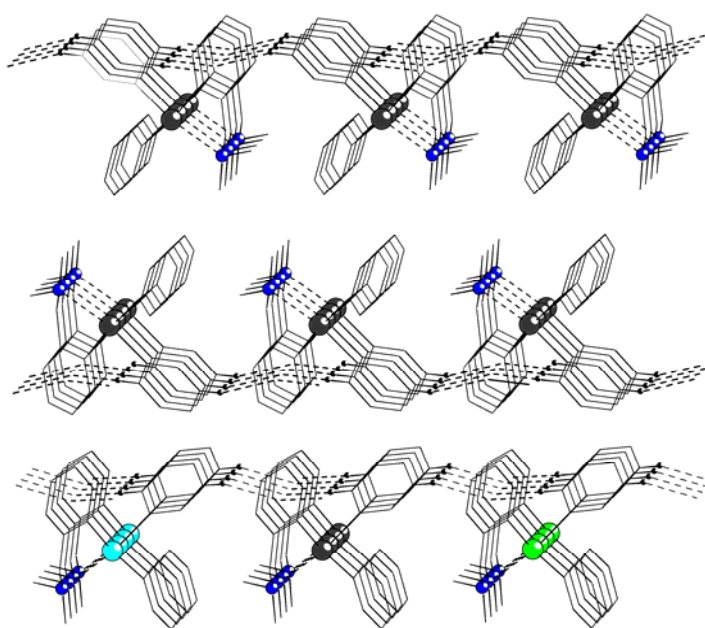

**Figure S13.** View along  $c$  axis of alternative layers of  $(R_N, C_{Sb})$  and  $(S_N, A_{Sb})$  isomers, respectively, in the crystal of 4.

[2-(Me<sub>2</sub>NCH<sub>2</sub>)C<sub>6</sub>H<sub>4</sub>]<sub>2</sub>PhSb (**5**)

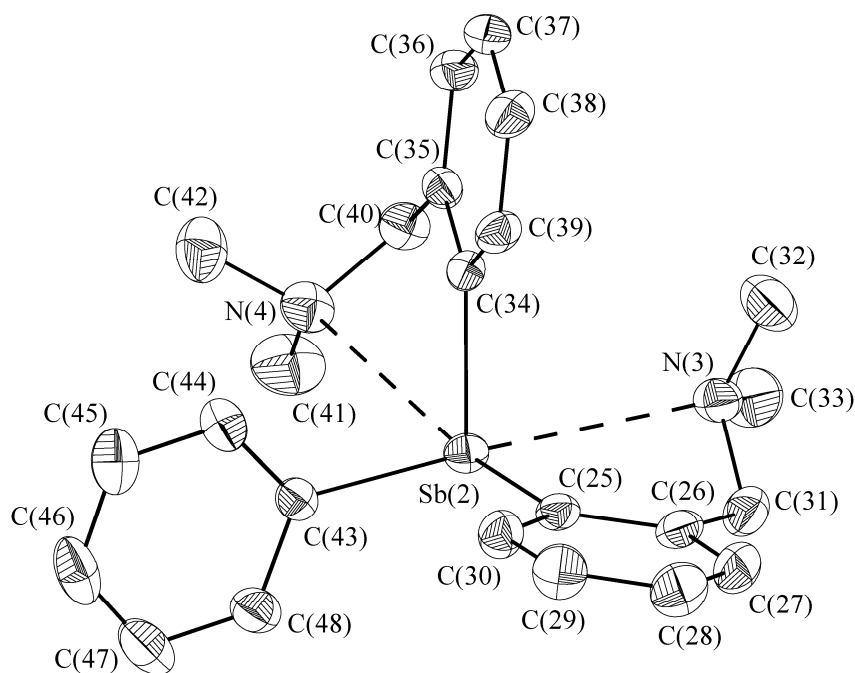

**Figure S14.** ORTEP representation at 30% probability and atom numbering scheme for (*S*<sub>N3</sub>,*S*<sub>N4</sub>,*C*<sub>Sb2</sub>)-**5b** isomer. Hydrogen atoms are omitted.

- the crystal contains a 1:1 mixture of (*R*<sub>N1</sub>,*R*<sub>N2</sub>,*A*<sub>Sb1</sub>) / (*S*<sub>N1</sub>,*S*<sub>N2</sub>,*C*<sub>Sb1</sub>)-**5a** and (*R*<sub>N3</sub>,*R*<sub>N4</sub>,*A*<sub>Sb2</sub>) / (*S*<sub>N3</sub>,*S*<sub>N4</sub>,*C*<sub>Sb2</sub>)-**5b** isomers

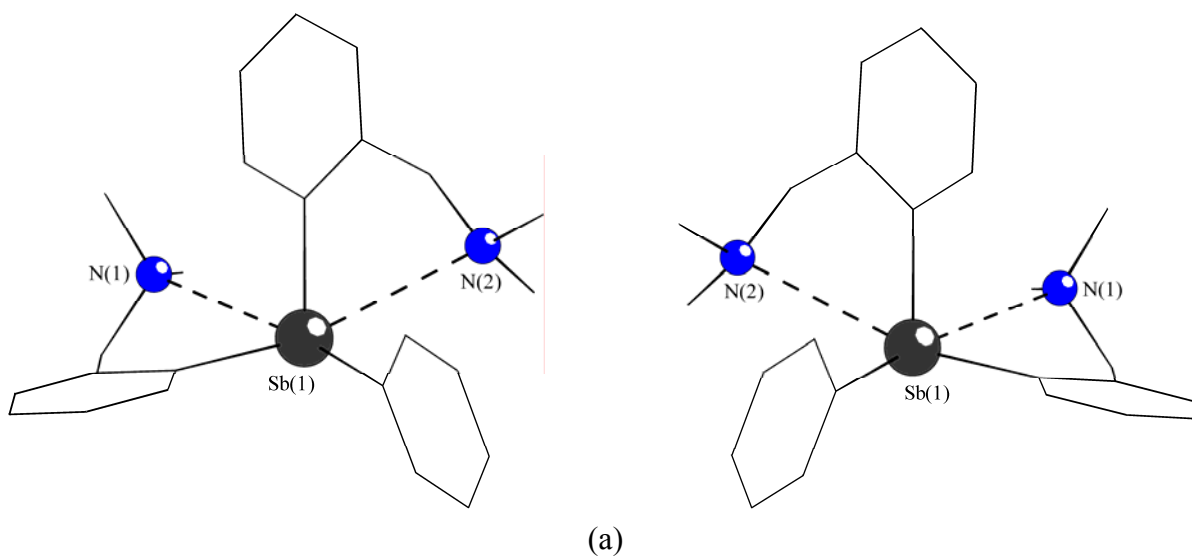

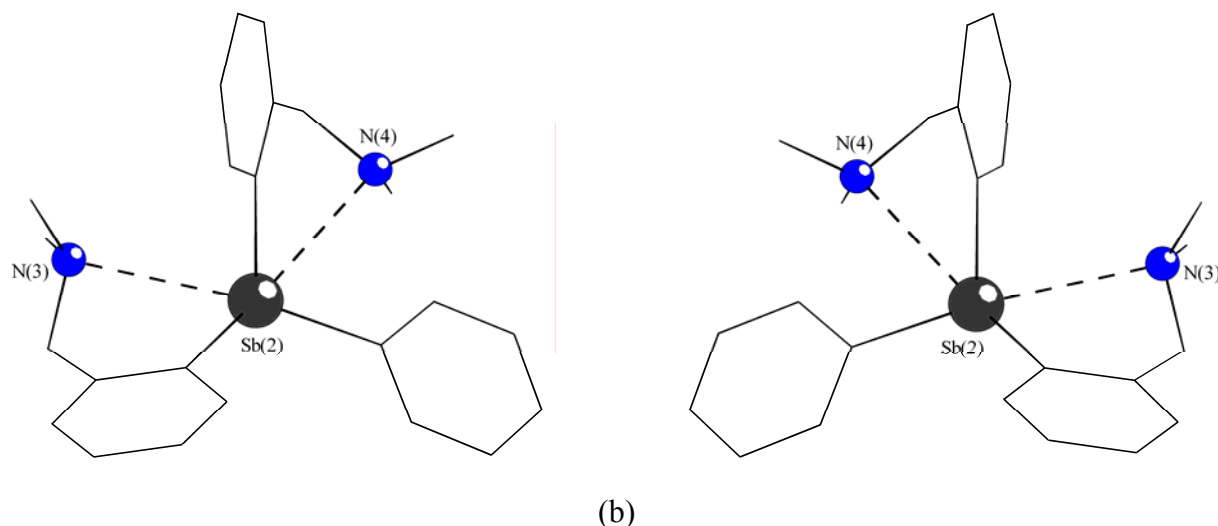

**Figure S15.** Molecular structure of (a)  $(R_{N1}, R_{N2}, A_{Sb1})$ -**5a** (left) and  $(S_{N1}, S_{N2}, C_{Sb1})$ -**5a** (right) isomers, and (b)  $(R_{N3}, R_{N4}, A_{Sb2})$ -**5b** isomer (left) and  $(S_{N3}, S_{N4}, C_{Sb2})$ -**5b** isomer (right), in the crystal of **5**.

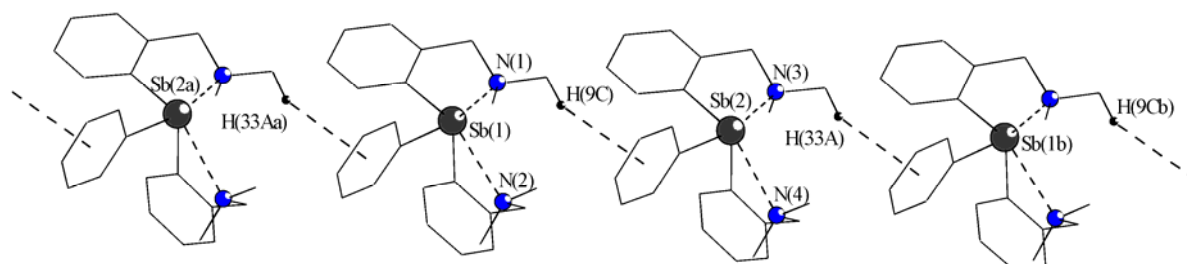

**Figure S16.** View along axis *a* of a chain polymer based on C-H<sub>methyl</sub>... $\pi$  (Ph<sub>centroid</sub>) contacts between alternating  $(R_{N1}, R_{N2}, A_{Sb1})$ -**5a** and  $(S_{N3}, S_{N4}, C_{Sb2})$ -**5b** isomers in the crystal of **5** (only hydrogen atoms involved in intermolecular contacts are shown) [symmetry equivalent atoms  $(x, y, 1 + z)$  and  $(x, y, -1 + z)$  are given by “a” and “b”, respectively].

- intra chain distance  $C(17)$ -H(17)··· $\pi$  (Ph<sub>centroid</sub>) 3.06 Å
- no further contacts between parallel chains.

**[2-(Me<sub>2</sub>NCH<sub>2</sub>)C<sub>6</sub>H<sub>4</sub>]PhMesSb (6)**

- the crystal contains a 1:1 mixture of (*R*<sub>N</sub>,*A*<sub>Sb</sub>) and (*S*<sub>N</sub>,*C*<sub>Sb</sub>) isomers

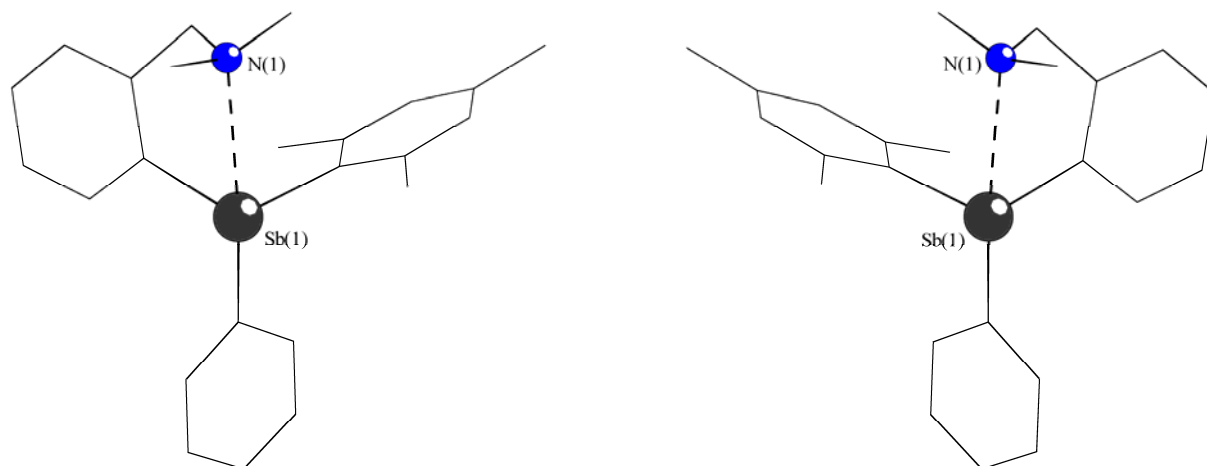

**Figure S17.** Molecular structure of (*R*<sub>N</sub>,*A*<sub>Sb</sub>)-**6** isomer (*left*) and (*S*<sub>N</sub>,*C*<sub>Sb</sub>)-**4** isomer (*right*) in the crystal of **6**.

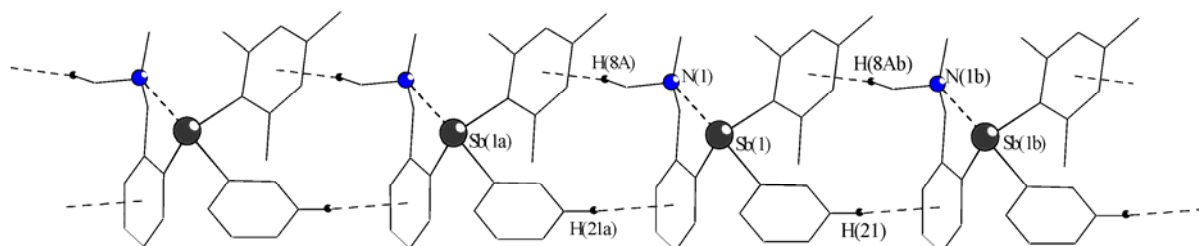

**Figure S18.** View of a chain polymer based on C-H<sub>aryl</sub>... $\pi$  and C-H<sub>methyl</sub>... $\pi$  (Ph<sub>centroid</sub>) contacts between (*R*<sub>N</sub>,*A*<sub>Sb</sub>)-**6** isomers in the crystal of **6** (only hydrogen atoms involved in intermolecular contacts are shown) [symmetry equivalent atoms ( $-1 + x, y, z$ ) and ( $1 + x, y, z$ ) are given by “a” and “b”, respectively].

- intra chain distance
- |                                                |        |
|------------------------------------------------|--------|
| C(21)-H(21)··· $\pi$ (Ph <sub>centroid</sub> ) | 2.90 Å |
| C(8)-H(8A)··· $\pi$ (Ph <sub>centroid</sub> )  | 2.94 Å |

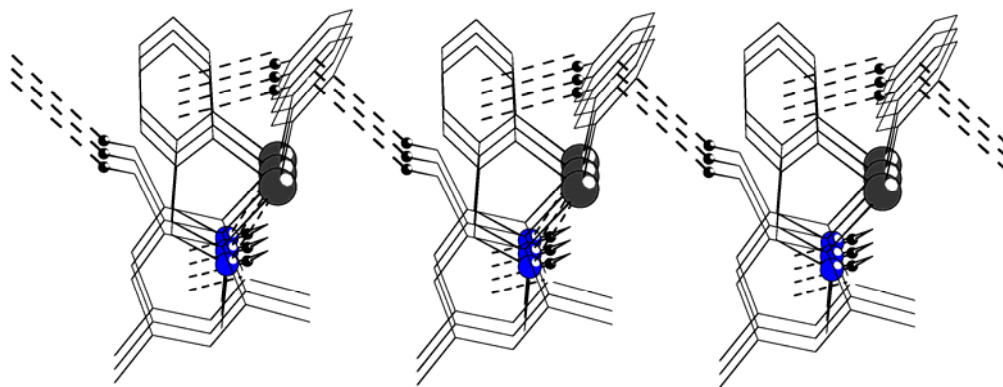

**Figure S19.** View of a layer of ( $R_N, A_{Sb}$ )-**6** isomers based on  $C-H_{\text{methyl}} \cdots \pi$  ( $\text{Ph}_{\text{centroid}}$ ) contacts in the crystal of **6** (only hydrogen atoms involved in intermolecular contacts are shown).

- inter-chain distance  $C(16)-H(16B) \cdots \pi$  ( $\text{Ph}_{\text{centroid}}$ ) 2.97 Å

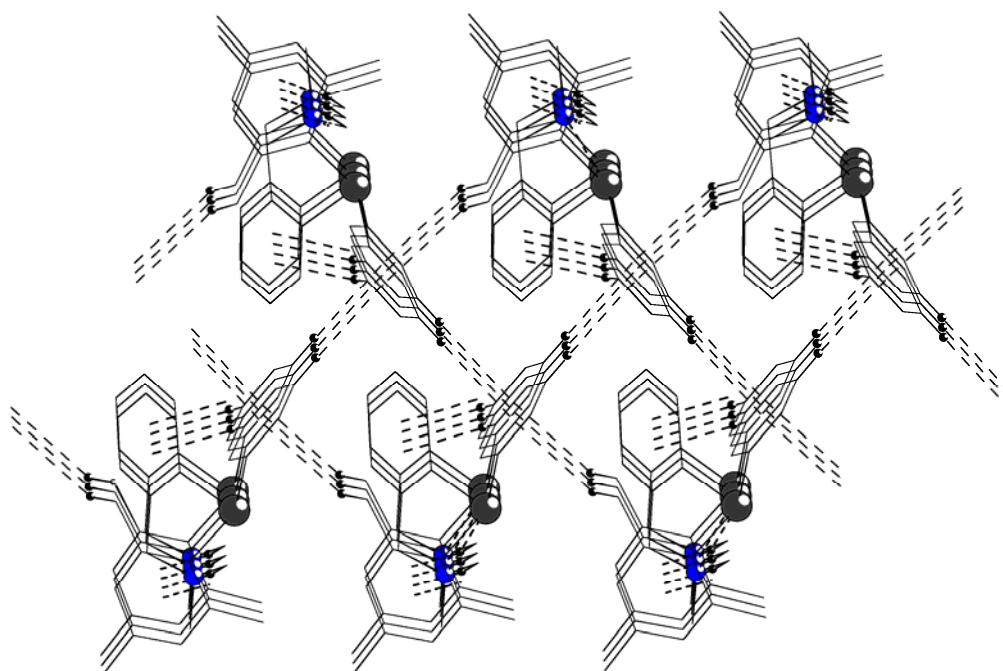

**Figure S20.** View of a double-layer association between layers of ( $R_N, A_{Sb}$ ) and ( $S_N, C_{Sb}$ ) isomers, respectively, in the crystal of **6**.

- inter-layer distance  $C(23)-H(23) \cdots \pi$  ( $\text{Ph}_{\text{centroid}}$ ) 2.98 Å

[2-(Me<sub>2</sub>NCH<sub>2</sub>)C<sub>6</sub>H<sub>4</sub>]MesSbBr (7)

- the crystal contains a 1:1 mixture of (*R*<sub>N</sub>,*C*<sub>Sb</sub>) and (*S*<sub>N</sub>,*A*<sub>Sb</sub>) isomers

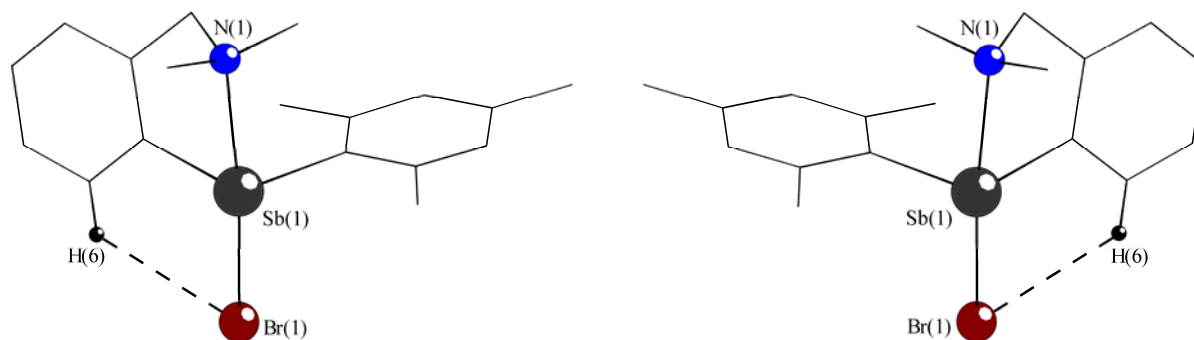

**Figure S21.** Molecular structure of (*R*<sub>N</sub>,*C*<sub>Sb</sub>)-7 isomer (*left*) and (*S*<sub>N</sub>,*A*<sub>Sb</sub>)-7 isomer (*right*) in the crystal of 7, showing the intramolecular bromine-hydrogen contact (only hydrogen atoms involved in intramolecular contacts are shown).

- intramolecular distance      Br(1)⋯H(6) 2.86 Å       $\sum r_{vdW}(\text{Br,H})$  3.15 Å

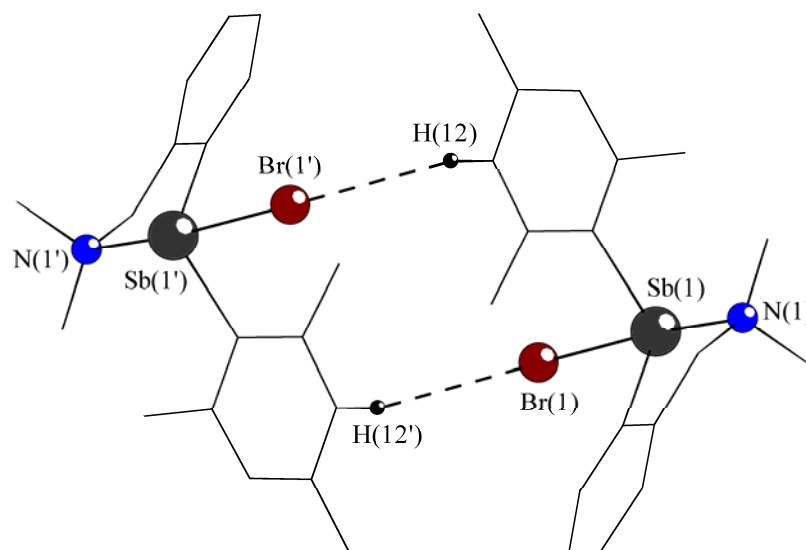

**Figure S22.** View of a dimer based on Br⋯H<sub>aryl</sub> contacts between (*R*<sub>N</sub>,*C*<sub>Sb</sub>) and (*S*<sub>N</sub>,*A*<sub>Sb</sub>)-7 isomers in the crystal of 7 (only hydrogen atoms involved in intermolecular contacts are shown) [symmetry equivalent atoms (1 - *x*, 1 - *y*, -*z*) are given by “prime”].

- intermolecular distance      Br(1)⋯H(12a) 3.07 Å

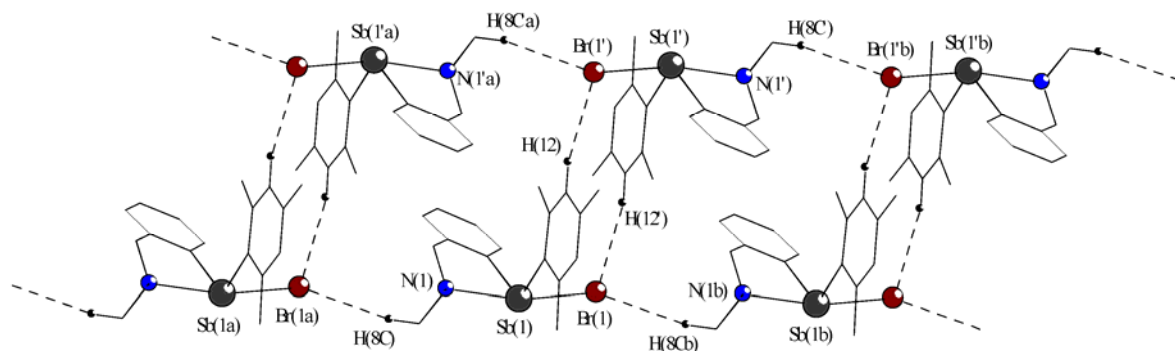

**Figure S23.** View of a columnar polymer of  $(R_N, C_{Sb}) / (S_N, A_{Sb})$ -7 dimer units based on  $\text{Br}\cdots\text{H}_{\text{methyl}}$  contacts in the crystal of **7** (only hydrogen atoms involved in intermolecular contacts are shown) [symmetry equivalent atoms  $(1-x, 1-y, -z)$ ,  $(x, 1-y, z)$ ,  $(1-x, -y, -z)$ ,  $(x, 1+y, z)$  and  $(1-x, 2-y, -z)$  are given by “prime”, “a”, “prime a”, “b” and “prime b”, respectively].

- inter-dimer distance

$\text{Br}(1)\cdots\text{H}(8\text{C})$  3.10 Å

**[2-(Me<sub>2</sub>NCH<sub>2</sub>)C<sub>6</sub>H<sub>4</sub>]MesSbBr (7)**

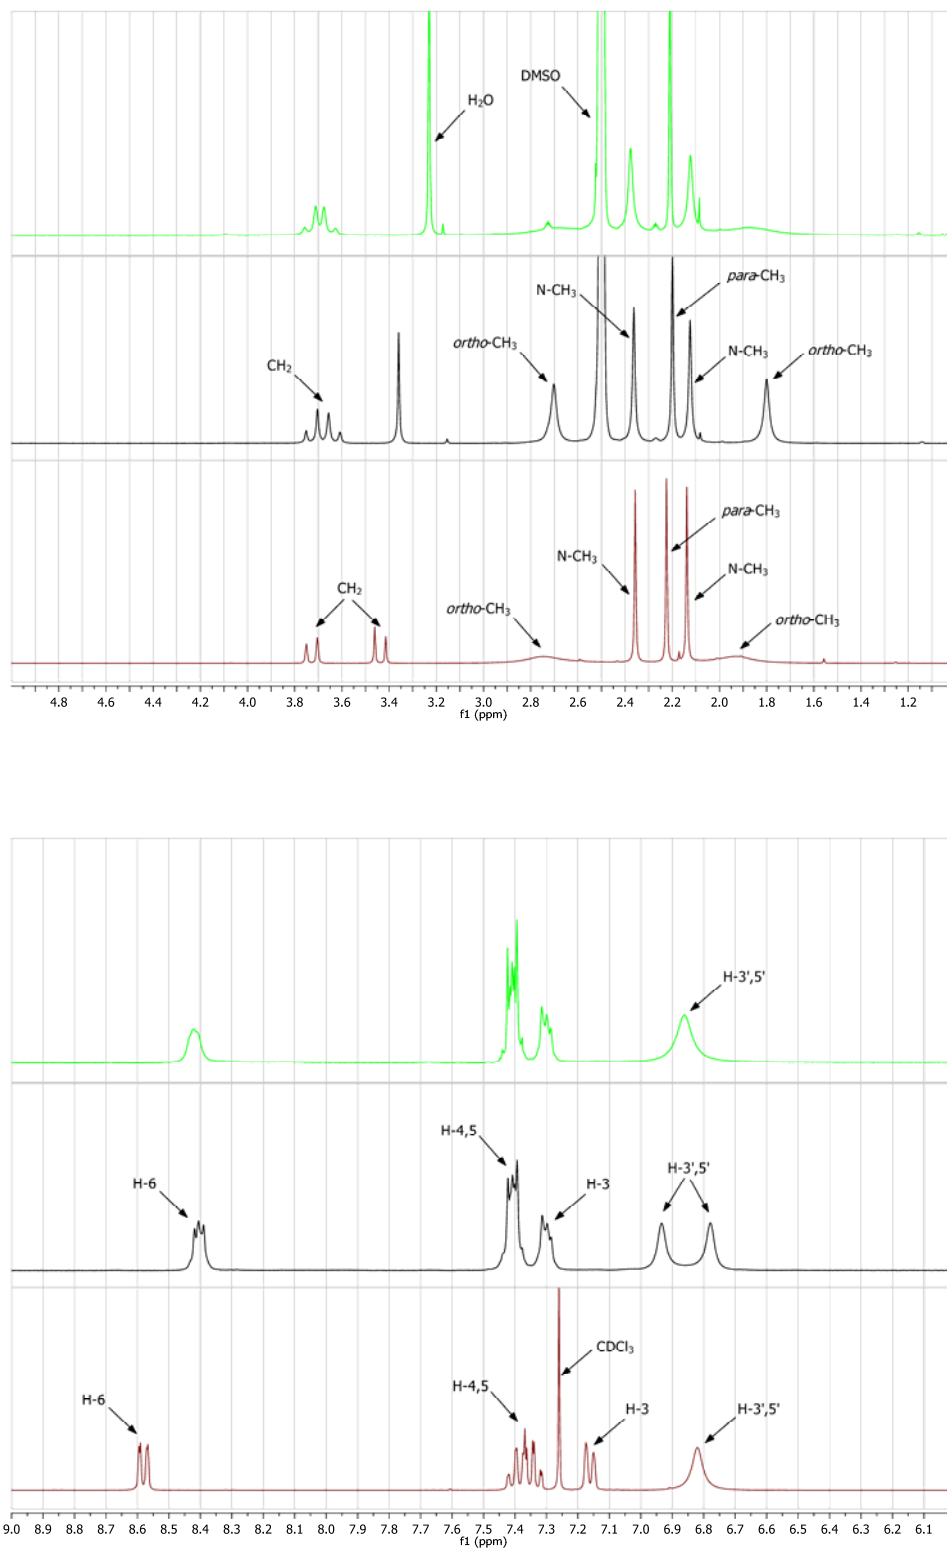

**Figure S23a.** <sup>1</sup>H NMR spectra of **7**: (*up*) aliphatic region, and (*down*) aromatic region [*violet* - in CDCl<sub>3</sub>, at r.t.; *black* - in DMSO-d<sub>6</sub>, at 20 °C; *green* - in DMSO-d<sub>6</sub>, at 45 °C].



### Coalescence of resonances for the aromatic protons of mesityl group in DMSO-d<sub>6</sub>

<sup>1</sup>H NMR (300 MHz, 20 °C, DMSO-d<sub>6</sub>): δ 1.80 (3 H, s, *ortho*-CH<sub>3</sub>), 2.12 [3 H, s, N(CH<sub>3</sub>)<sub>2</sub> (A)], 2.20 (3 H, s, *para*-CH<sub>3</sub>), 2.36 [3 H, s, N(CH<sub>3</sub>)<sub>2</sub> (B)], 2.70 (3 H, s, *ortho*-CH<sub>3</sub>), AB spin system with A at 3.633 and B at 3.728 ppm (2 H, CH<sub>2</sub>, <sup>2</sup>J<sub>HH</sub> 14.40 Hz), 6.78 (1 H, s,br, H-3',5', C<sub>6</sub>H<sub>2</sub>), 6.93 (1 H, s,br, H-3',5', C<sub>6</sub>H<sub>2</sub>), 7.30 (1 H, m, H-3, C<sub>6</sub>H<sub>4</sub>), 7.41 (2 H, ddd, H-4,5, C<sub>6</sub>H<sub>4</sub>), 8.40 (1 H, m, H-6, C<sub>6</sub>H<sub>4</sub>).

<sup>1</sup>H NMR (300 MHz, 45 °C, DMSO-d<sub>6</sub>): δ 1.87 (3 H, s,br, *ortho*-CH<sub>3</sub>), 2.12 [3 H, s, N(CH<sub>3</sub>)<sub>2</sub> (A)], 2.21 (3 H, s, *para*-CH<sub>3</sub>), 2.38 [3 H, s, N(CH<sub>3</sub>)<sub>2</sub> (B)], 2.68 (3 H, s,br, *ortho*-CH<sub>3</sub>), AB spin system with A at 3.651 and B at 3.734 ppm (2 H, CH<sub>2</sub>, <sup>2</sup>J<sub>HH</sub> 14.20 Hz), 6.86 (2 H, s,br, H-3',5', C<sub>6</sub>H<sub>2</sub>), 7.30 (1 H, m, H-3, C<sub>6</sub>H<sub>4</sub>), 7.41 (2 H, ddd, H-4,5, C<sub>6</sub>H<sub>4</sub>), 8.42 (1 H, m, H-6, C<sub>6</sub>H<sub>4</sub>).

[2-(Me<sub>2</sub>NCH<sub>2</sub>)C<sub>6</sub>H<sub>4</sub>]MesSbI (**8**)

- the crystal contains a 1:1 mixture of (*R*<sub>N</sub>,*C*<sub>Sb</sub>) and (*S*<sub>N</sub>,*A*<sub>Sb</sub>) isomers

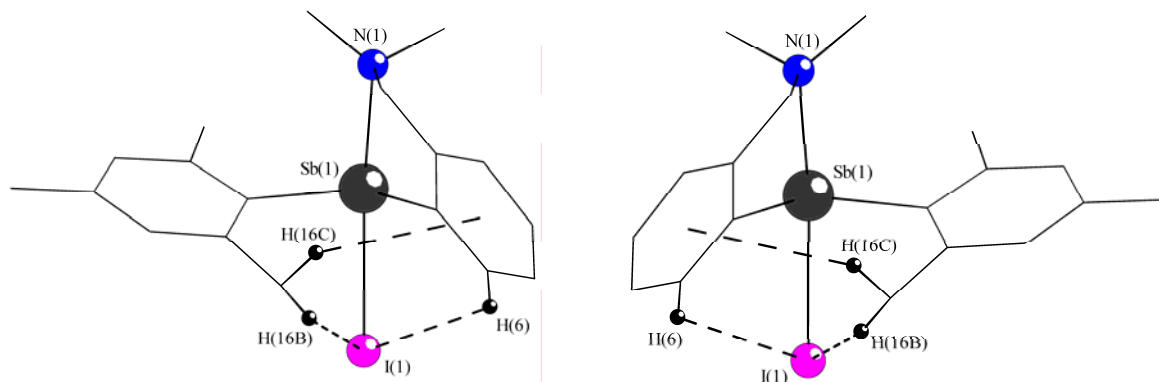

**Figure S24.** Molecular structure of (*R*<sub>N</sub>,*C*<sub>Sb</sub>)-**8** isomer (*left*) and (*S*<sub>N</sub>,*A*<sub>Sb</sub>)-**8** isomer (*right*) in the crystal of **8**, showing the intramolecular iodine-hydrogen and C-H<sub>methyl</sub>...π (Ph<sub>centroid</sub>) contacts (only hydrogen atoms involved in intramolecular interactions are shown).

- intramolecular distance
 

|                                            |        |                                        |
|--------------------------------------------|--------|----------------------------------------|
| I(1)···H(6)                                | 3.06 Å | Σ <i>r</i> <sub>vdw</sub> (I,H) 3.35 Å |
| I(1)···H(16B)                              | 3.23 Å |                                        |
| C(16)-H(16C)···π (Ph <sub>centroid</sub> ) | 3.02 Å |                                        |

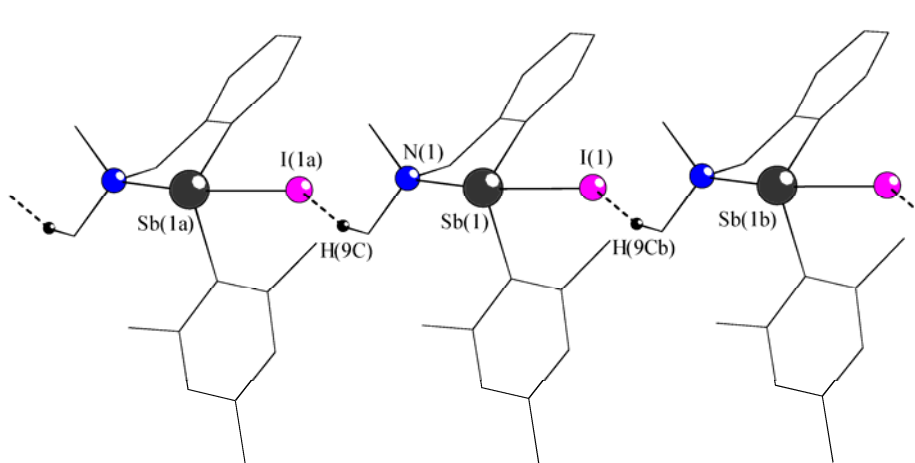

**Figure S25.** View of a chain polymer association based on I···H<sub>methyl</sub> contacts between (*S*<sub>N</sub>,*A*<sub>Sb</sub>)-**8** isomers in the crystal of **8** (only hydrogen atoms involved in intermolecular contacts are shown) [symmetry equivalent atoms (−1 + *x*, *y*, *z*) and (1 + *x*, *y*, *z*) are given by “a” and “b”, respectively].

- intermolecular distance I(1)···H(9Cb) 3.17 Å

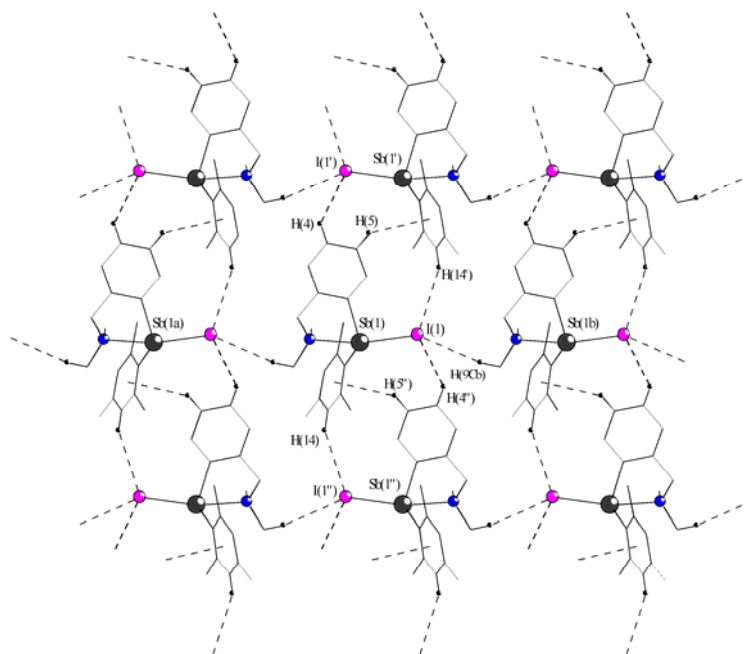

**Figure S26.** View along axis  $c$  of a layer of  $(S_N, A_{Sb})$ -**8** isomers based on  $I \cdots H_{\text{methyl}}$ ,  $I \cdots H_{\text{aryl}}$  and  $C-H_{\text{aryl}} \cdots \pi$  ( $\text{Ph}_{\text{centroid}}$ ) contacts in the crystal of **8** (only hydrogen atoms involved in intermolecular contacts are shown) [symmetry equivalent atoms  $(2-x, 0.5+y, 0.5-z)$  and  $(2-x, -0.5+y, 0.5-z)$  are given by “prime” and “double prime”, respectively].

|                           |                                                          |        |
|---------------------------|----------------------------------------------------------|--------|
| - intermolecular distance | $I(1) \cdots H(14')$                                     | 3.31 Å |
|                           | $I(1) \cdots H(4'')$                                     | 3.34 Å |
|                           | $C(5)-H(5) \cdots \pi$ ( $\text{Ph}_{\text{centroid}}$ ) | 3.00 Å |

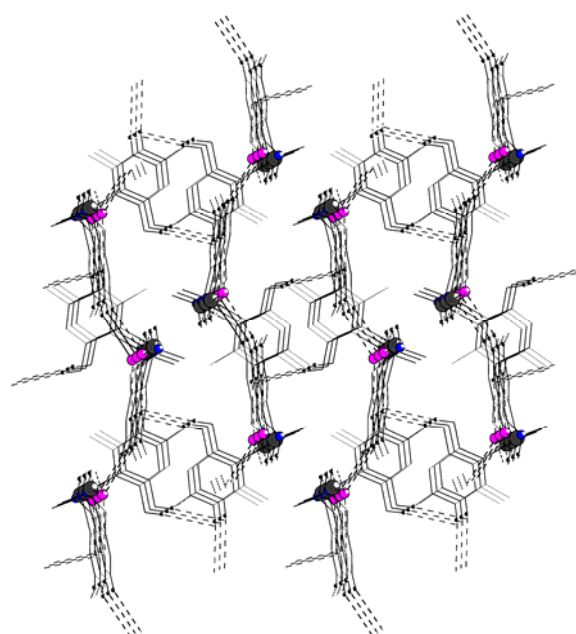

**Figure S27.** View along axis  $a$  of the 3D structure built from alternating layers of  $(R_N, C_{Sb})$ -**8** and  $(S_N, A_{Sb})$ -**8** isomers based on  $C-H_{\text{methyl}} \cdots \pi$  ( $\text{Ph}_{\text{centroid}}$ ) contacts in the crystal of **8** (only hydrogen atoms involved in intermolecular contacts are shown).

|                           |                                                             |        |
|---------------------------|-------------------------------------------------------------|--------|
| - intermolecular distance | $C(16)-H(16A) \cdots \pi$ ( $\text{Ph}_{\text{centroid}}$ ) | 2.99 Å |
|---------------------------|-------------------------------------------------------------|--------|

**[2-(Me<sub>2</sub>NCH<sub>2</sub>)C<sub>6</sub>H<sub>4</sub>]Mes<sub>2</sub>Sb (9)**

<sup>1</sup>H NMR (200 MHz, 20 °C, C<sub>6</sub>D<sub>6</sub>): δ 1.79 [6 H, s, N(CH<sub>3</sub>)<sub>2</sub>], 2.13 (6 H, s, *para*-CH<sub>3</sub>), 2.40 (12 H, s, *ortho*-CH<sub>3</sub>), 3.35 (2 H, s, CH<sub>2</sub>), 6.77 (4 H, s, H-3',5', C<sub>6</sub>H<sub>2</sub>), 6.91 (1 H, m, H-5, C<sub>6</sub>H<sub>4</sub>), 7.03 (2 H, m, H-3,4, C<sub>6</sub>H<sub>4</sub>), 7.91 (1 H, d, H-6, C<sub>6</sub>H<sub>4</sub>, <sup>3</sup>J<sub>HH</sub> 7.2 Hz).

<sup>13</sup>C-NMR (50 MHz, 20 °C, C<sub>6</sub>D<sub>6</sub>): 20.98 (s, *para*-CH<sub>3</sub>), 26.16 (s, *ortho*-CH<sub>3</sub>), 44.31 [s, N(CH<sub>3</sub>)<sub>2</sub>], 66.21 (s, CH<sub>2</sub>), 128.17 (s, C-5), 128.31 (s, C-4), 128.84 (s, C-3), 129.19 (s, C-3',5'), 137.46 (s, C-1'), 138.20 (s, C-6), 139.43 (s, C-4'), 140.13 (s, C-1), 144.99 (s, C-2',6'), 145.26 (s C-2).
